# Supplementary material for: Signatures of human European Palaeolithic expansion shown by resequencing of non-recombining X-chromosome segments
Source: PubMed Central journal article supplement (PMC5386427; doi:10.1038/ejhg.2016.207), 2017-01-25
Supplement: ejhg2016207x3.pdf [file ejhg2016207x3.pdf]

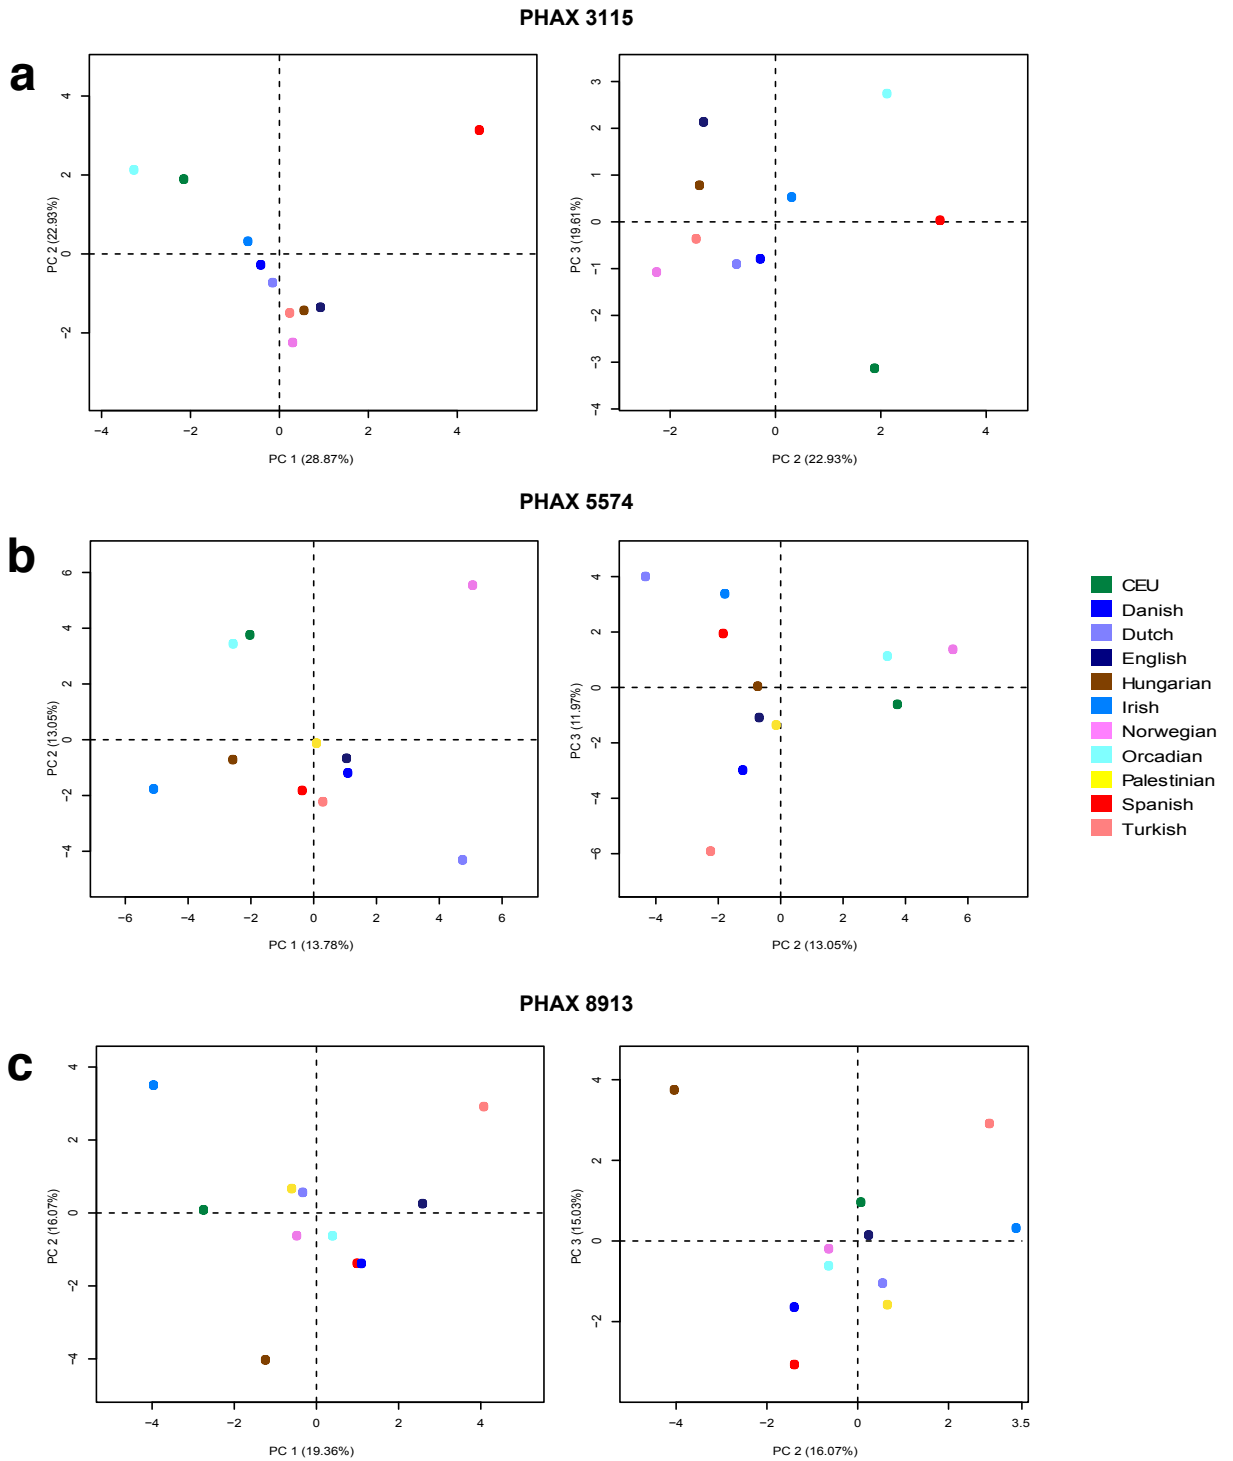

**Figure S2: PCA for all three PHAXs omitting the YRI.**  
 Palestinian samples were also excluded for PHAX 3115.
