# Supplementary material for: Signatures of human European Palaeolithic expansion shown by resequencing of non-recombining X-chromosome segments
Source: PubMed Central journal article supplement (PMC5386427; doi:10.1038/ejhg.2016.207), 2017-01-25
Supplement: ejhg2016207x6.pdf [file ejhg2016207x6.pdf]

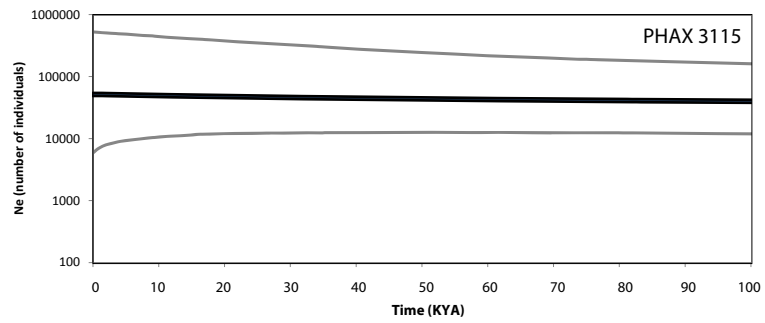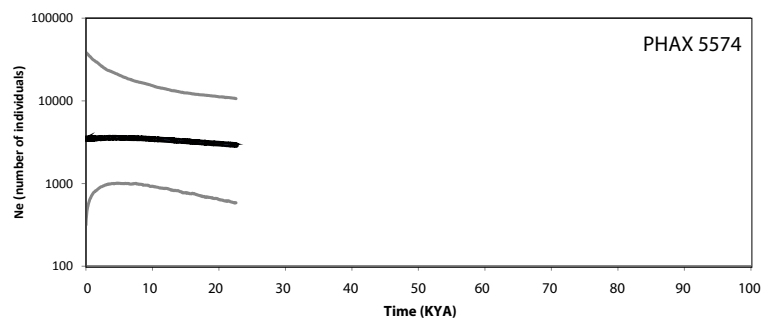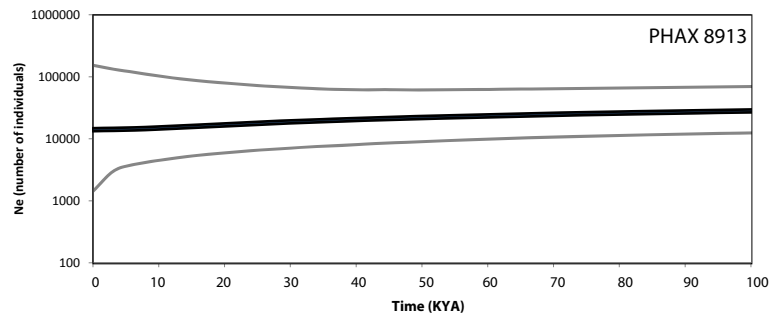

**Figure S5: Bayesian Skyline Plots for the three PHAXs in the Palestinian sample.**

Thick black lines indicate the median for effective population size ( $N_e$ ) and thinner grey lines show 95% higher posterior density intervals.
