# Supplementary material for: Signatures of human European Palaeolithic expansion shown by resequencing of non-recombining X-chromosome segments
Source: PubMed Central journal article supplement (PMC5386427; doi:10.1038/ejhg.2016.207), 2017-01-25
Supplement: ejhg2016207x7.pdf [file ejhg2016207x7.pdf]

a PHAX 3315

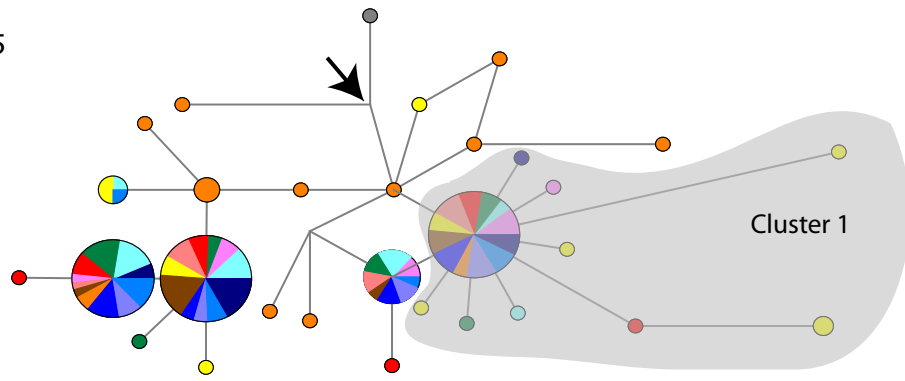

b PHAX 5574

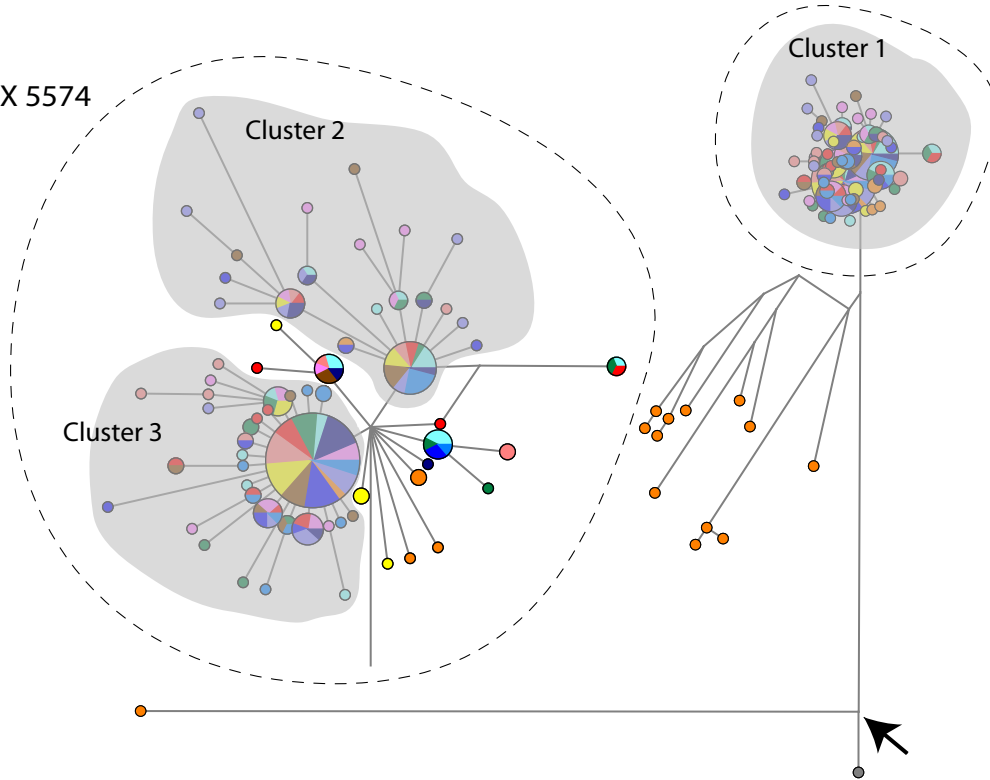

c PHAX 8913

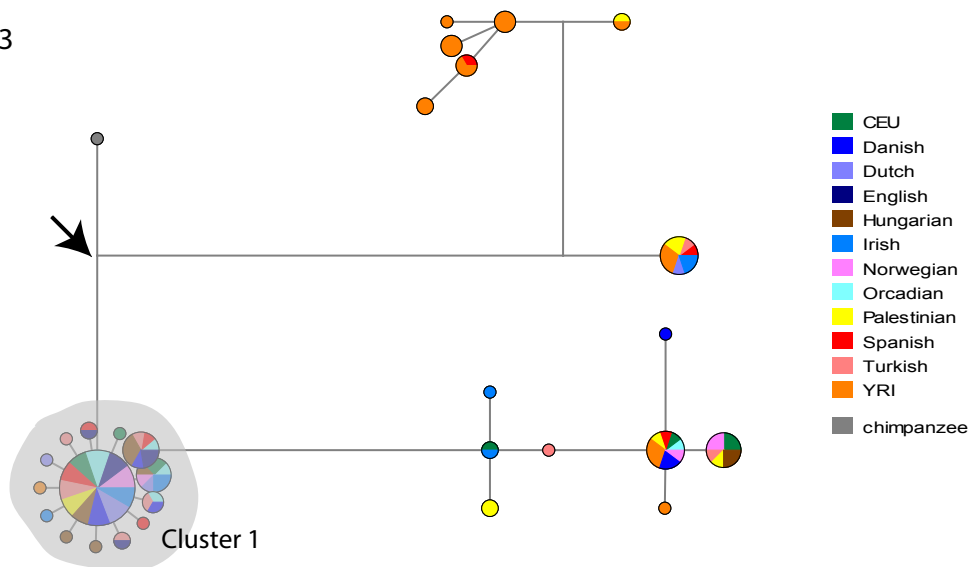

**Figure S6: Median-joining networks showing clusters of haplotypes used in dating.** Networks are shown as in Figures 4 and S3. Clusters used for dating (Table 3) are indicated by grey shading, and arrows indicate ancestral nodes.
