# Supplementary material for: Signatures of human European Palaeolithic expansion shown by resequencing of non-recombining X-chromosome segments
Source: PubMed Central journal article supplement (PMC5386427; doi:10.1038/ejhg.2016.207), 2017-01-25
Supplement: ejhg2016207x9.pdf [file ejhg2016207x9.pdf]

**a** PHAX 3315

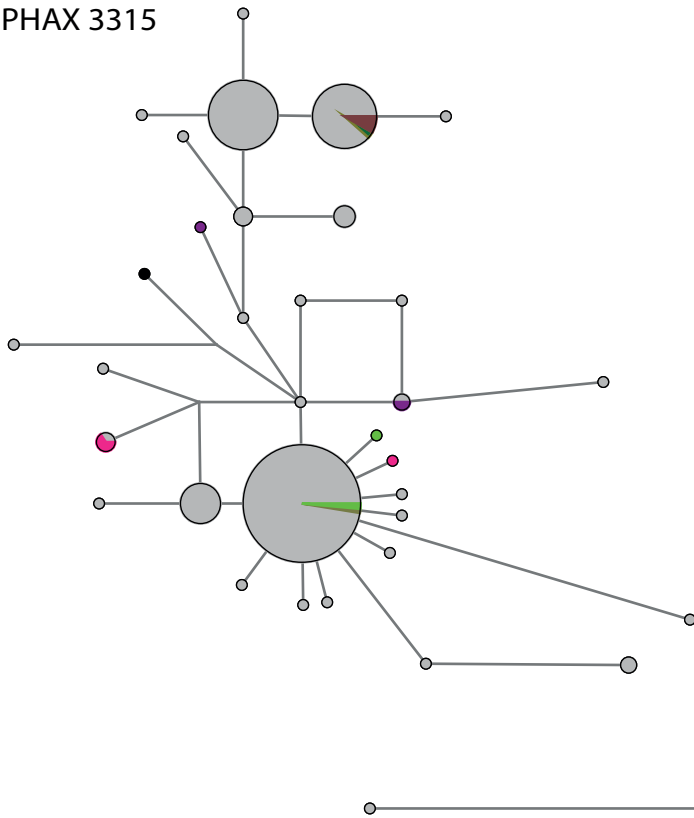

**b** PHAX 5574

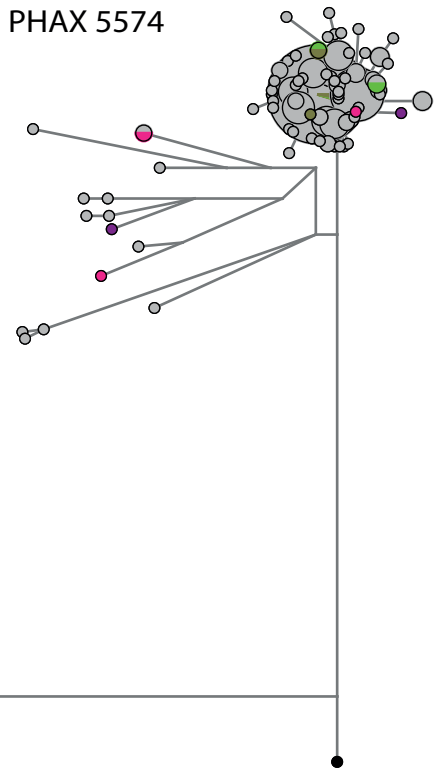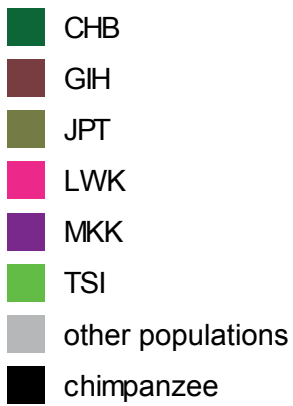

**c** PHAX 8913

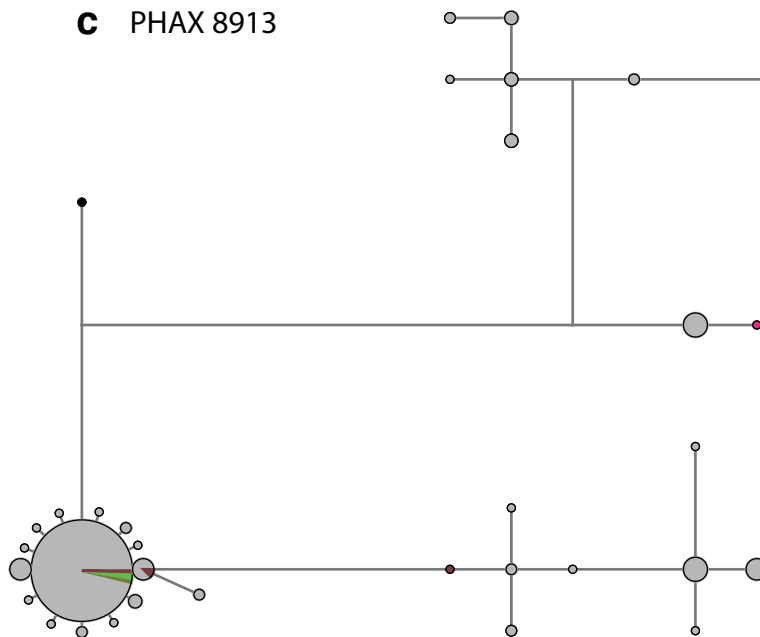

**Figure S8: Median-joining networks including additional samples from Complete Genomics dataset.**

Networks are shown as in Figures 4 and S3. Additional samples from the Complete Genomics dataset are highlighted by colours for the six populations as shown in the key, and the chimpanzee haplotype is also indicated.
